# Supplementary material for: Hierarchical ZnO aggregates assembled by orderly aligned nanorods for dye-sensitized solar cells
Source: Royal Society of Chemistry journal article supplement (doi:10.1039/c2ce26460a), 2012-11-19
Supplement: c2ce26460a.pdf [file c2ce26460a.pdf]

## Electronic Supplementary Information (ESI)

### Hierarchical ZnO Aggregates Assembled by Orderly Aligned Nanorods for Dye-sensitized Solar Cells

Dapeng Wu<sup>ab</sup>, Zhiyong Gao<sup>ab</sup>, Fang Xu<sup>a</sup>, Jiuli Chang<sup>a</sup>, Wenguang Tao<sup>a</sup>, Jinjin He<sup>a</sup>,

Shuyan Gao<sup>a</sup> and Kai Jiang<sup>\*ab</sup>

<sup>a</sup>School of Chemistry and Chemical Engineering, Henan Key Laboratory of Photovoltaic Materials, Xinxiang, Henan, PR China.

<sup>b</sup>Engineering Technology Research Center of Motive Power and Key Materials of Henan Province, Xinxiang, Henan 453007, PR China.

\* To whom all correspondence should be addressed.

E-mail: [jiangkai6898@126.com](mailto:jiangkai6898@126.com);

Fax&Tel: +86 373 3326209.

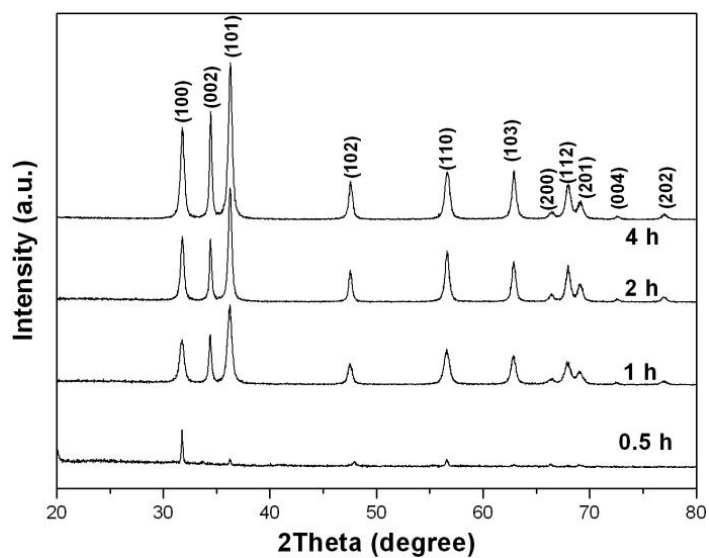

**Fig. S1.** XRD curves of the intermediate ZnO products collected at different time intervals.

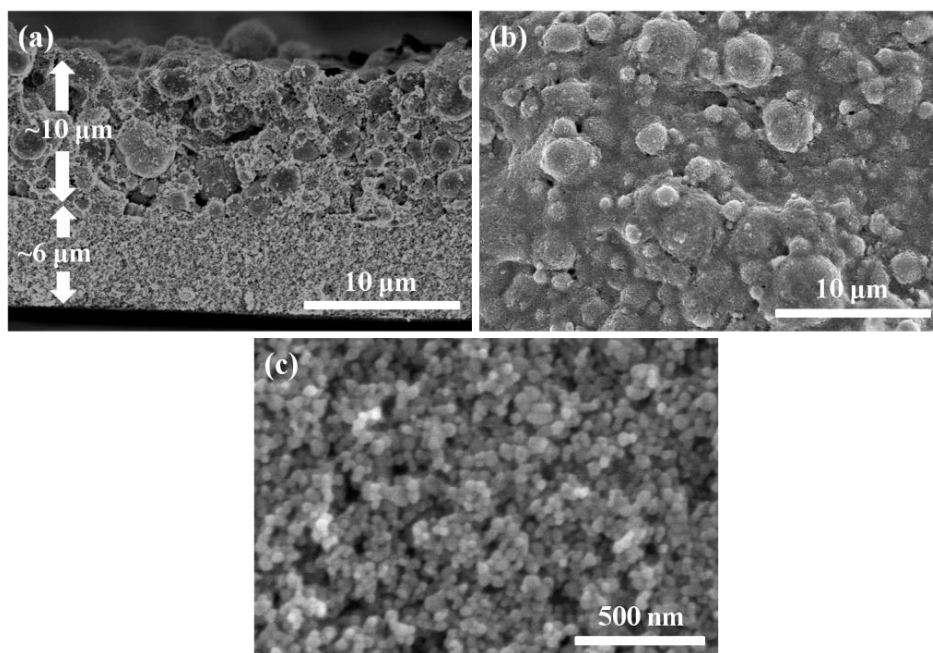

**Fig. S2.** SEM images of the as-prepared photoanode for Cell-S2: (a) cross-section view, (b) surface of the scattering layer and (c) the underlayer consisting of ZnO nanoparticles.
